# Supplementary material for: Conserved G-Quadruplex-Forming Sequences in Mammalian TERT Promoters and Their Effect on Mutation Frequency
Source: MDPI journal article supplement (doi:10.3390/life13071478), 2023-06-29
Supplement: s1 [file s1]

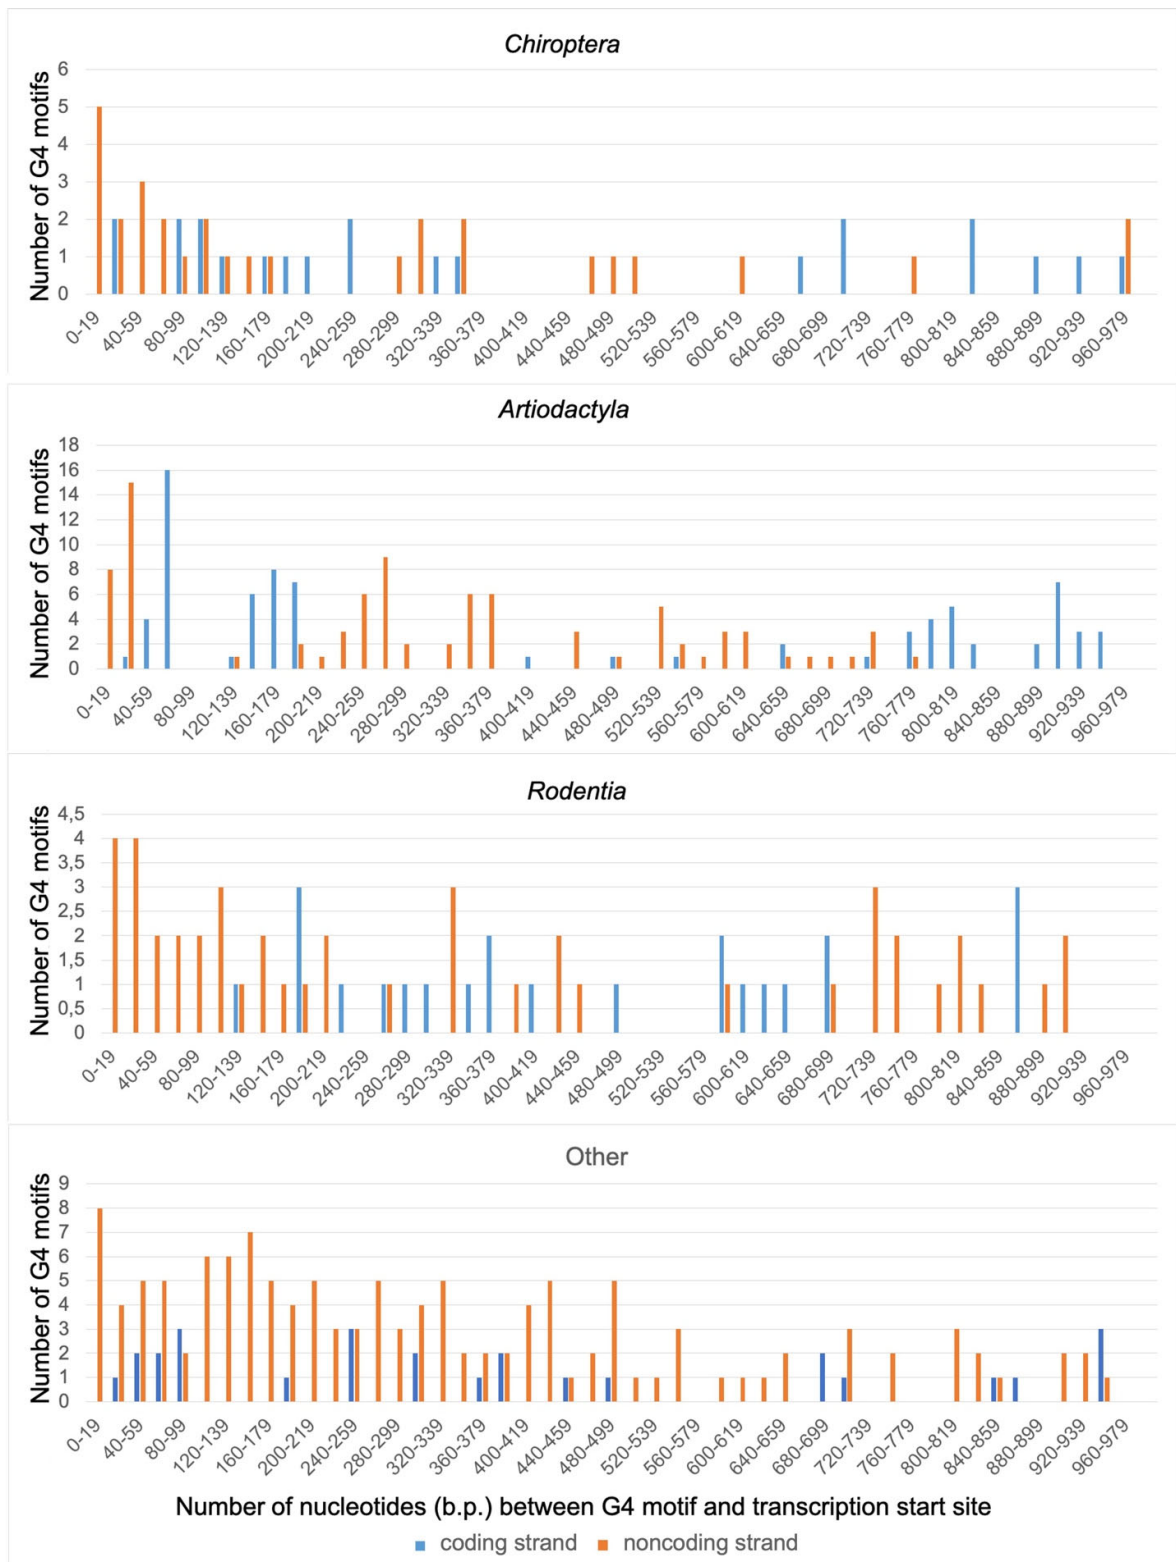

**Figure S1.** Number and distances of G4 motifs from the transcription start site on the coding (blue columns) and noncoding (orange columns) strands of the 1000-bp *TERT* promoter region for different orders of mammals.

## 1) Primates

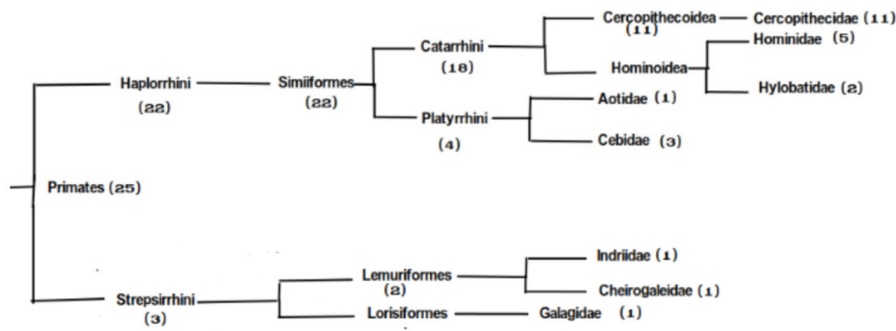

## 2) Artiodactyla

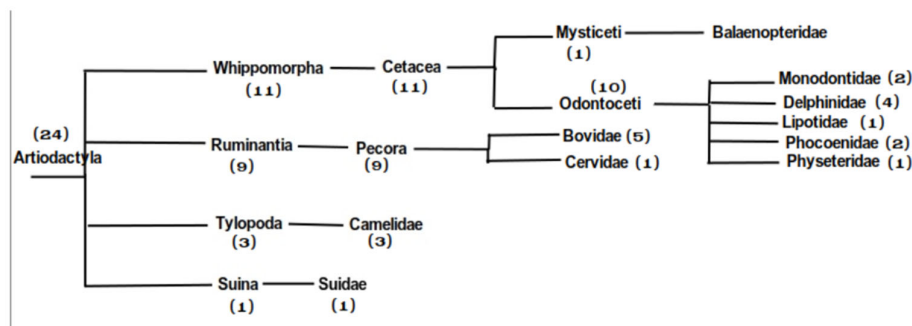

## 3) Carnivora

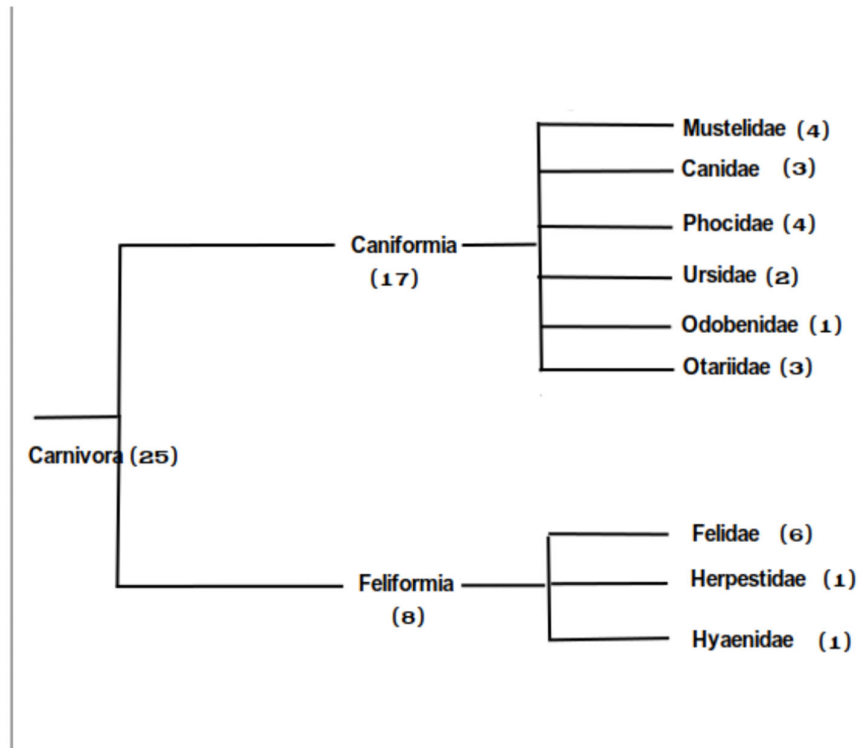

#### 4) Rodentia

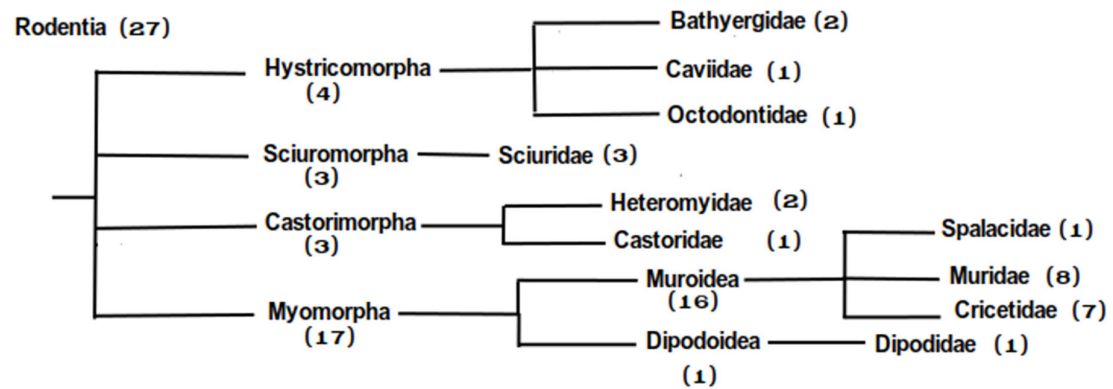

#### 5) Chiroptera

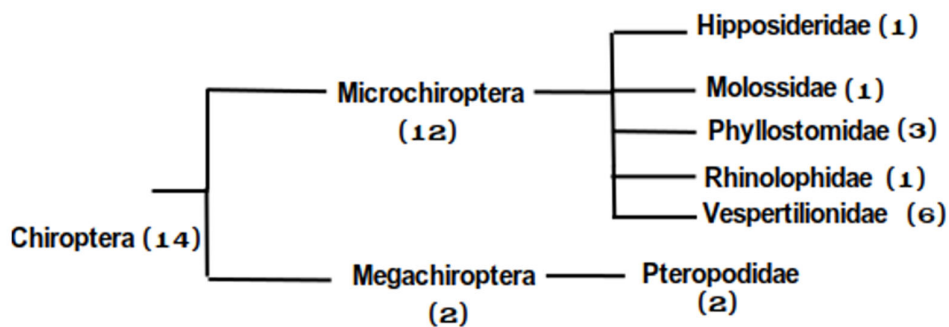

**Figure S2.** Taxonomical trees constructed for five orders of mammals; the number of species is given in brackets.

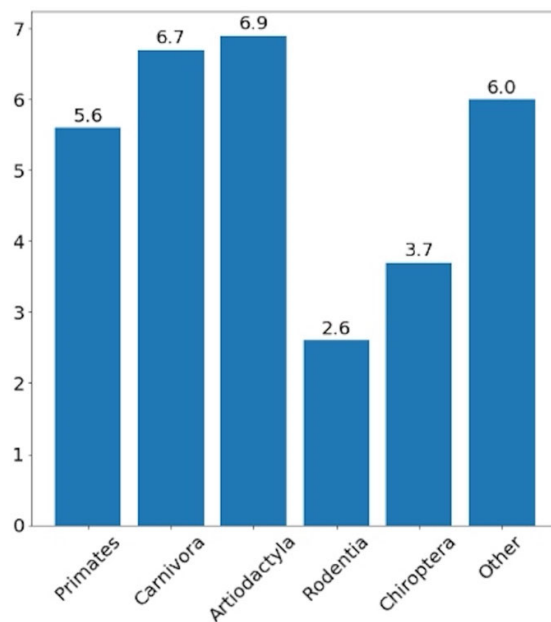

**Figure S3.** Average number of G4 motifs per species for different orders of mammals.

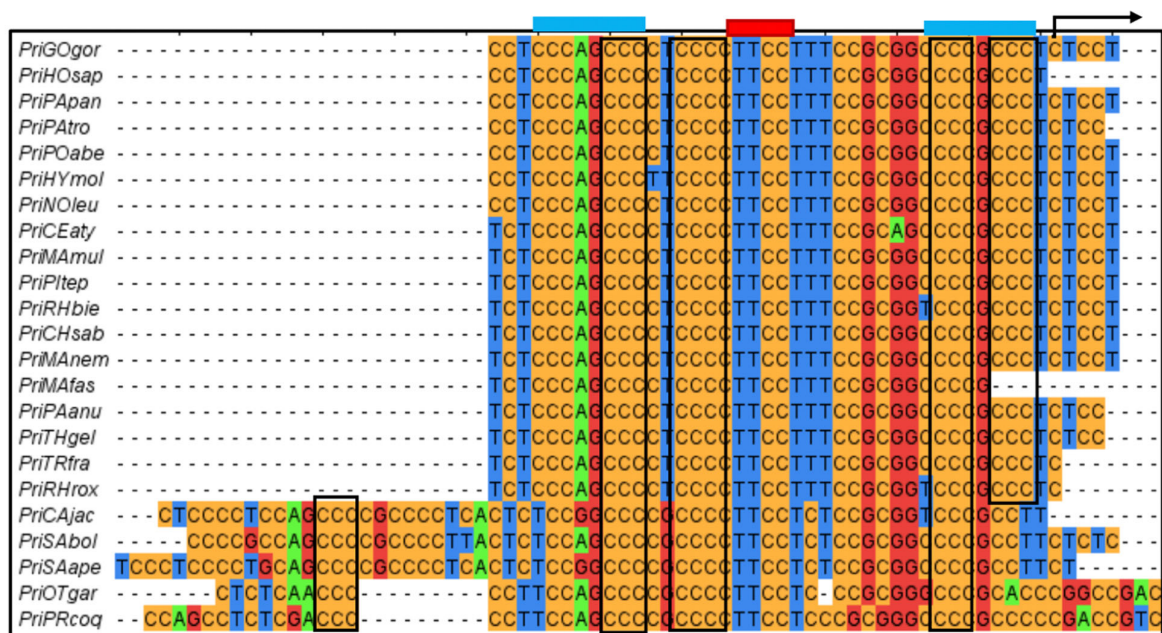

**Figure S4.** Overlap of conserved G4 motif in *TERT* promoter regions with binding sites of transcription factors Sp1 and Ets. Black arrow marks +1 nucleotide in the transcript according to the *hTERT* gene annotation. Conserved G-tracts are marked with black frames. Note that this motif is formed on a noncoding DNA strand, so it looks like cytosine tracts. Experimentally proven Sp1 recognition sites, known as Sp1 sites 1 and 2, are shown as blue bars. The core of Ets recognition site is shown by the red bar. The Ets site is located between Sp1 1 and 2 sites. Conserved G4 motifs are found in 18 higher species from the families *Hominidae*, *Hylobatidae* and *Cercopithecidae*, which together form the superorder clade *Laurasiatheria*. In five evolutionary distant primates, an alternative conserved G4 motif may be detected. It includes lower left G-tract in black frame and three other G-tracts that are aligned with the G-tracts of the conserved G4 motif in *Laurasiatheria*. Our procedure of promoter definition sometime results in an inaccurate TSS determination. This is the case in the PriMAfas sequence. The 3'-terminal G-tract is not defined in it, probably due to this kind of error.

**Table S1.** The mammalian species used in this study. All 141 species are presented with identifiers and taxonomy information taken from the NCBI Taxonomy database. Some terms may not coincide with those commonly used in evolutionary biology.

| Scientific name       | species code | AC           | order code | Number of species per order | subclass, clade, superorder,<br>clade | order    | Between order and family | family       | subfamily    | genus          |
|-----------------------|--------------|--------------|------------|-----------------------------|---------------------------------------|----------|--------------------------|--------------|--------------|----------------|
| Castor canadensis     | rodCAcan     | NW_017872232 | Rod        | 27                          | Th-Eu-Eua-Gli                         | Rodentia | Castorimorpha            | Castoridae   |              | Castor         |
| Dipodomys spectabilis | rodDispe     | NW_024870856 | Rod        | 27                          | Th-Eu-Eua-Gli                         | Rodentia | Castorimorpha            | Heteromyidae | Dipodomyinae | Dipodomys      |
| Dipodomys ordii       | rodDlord     | NW_012267237 | Rod        | 27                          | Th-Eu-Eua-Gli                         | Rodentia | Castorimorpha            | Heteromyidae | Dipodomyinae | Dipodomys      |
| Fukomys damarensis    | rodFUdam     | NW_022900913 | Rod        | 27                          | Th-Eu-Eua-Gli                         | Rodentia | Hystricomorpha           | Bathyergidae |              | Fukomys        |
| Heterocephalus glaber | rodHEgla     | NW_004624751 | Rod        | 27                          | Th-Eu-Eua-Gli                         | Rodentia | Hystricomorpha           | Bathyergidae |              | Heterocephalus |
| Cavia porcellus       | rodCApor     | NT_176269    | Rod        | 27                          | Th-Eu-Eua-Gli                         | Rodentia | Hystricomorpha           | Caviidae     |              | Cavia          |
| Octodon degus         | rodOCdeg     | NW_004524584 | Rod        | 27                          | Th-Eu-Eua-Gli                         | Rodentia | Hystricomorpha           | Octodontidae |              | Octodon        |
| Jaculus jaculus       | rodJAJac     | NC_059121    | Rod        | 27                          | Th-Eu-Eua-Gli                         | Rodentia | Myo-Dip                  | Dipodidae    | Dipodinae    | Jaculus        |
| Microtus oregoni      | rodMlore     | NW_024543207 | Rod        | 27                          | Th-Eu-Eua-Gli                         | Rodentia | Myo-Mur                  | Cricetidae   | Arvicolinae  | Microtus       |
| Microtus ochrogaster  | rodMloch     | NC_022021    | Rod        | 27                          | Th-Eu-Eua-Gli                         | Rodentia | Myo-Mur                  | Cricetidae   | Arvicolinae  | Microtus       |

|                                       |          |              |     |    |               |          |              |            |             |                               |
|---------------------------------------|----------|--------------|-----|----|---------------|----------|--------------|------------|-------------|-------------------------------|
| <i>Cricetulus griseus</i>             | rodCRgri | NC_048595    | Rod | 27 | Th-Eu-Eua-Gli | Rodentia | Myo-Mur      | Cricetidae | Cricetinae  | <i>Cricetulus</i>             |
| <i>Mesocricetus auratus</i>           | rodMEaur | NW_024429198 | Rod | 27 | Th-Eu-Eua-Gli | Rodentia | Myo-Mur      | Cricetidae | Cricetinae  | <i>Mesocricetus</i>           |
| <i>Onychomys torridus</i>             | rodONTor | NC_050457    | Rod | 27 | Th-Eu-Eua-Gli | Rodentia | Myo-Mur      | Cricetidae | Neotominae  | <i>Onychomys</i>              |
| <i>Peromyscus leucopus</i>            | rodPEleu | NC_051079    | Rod | 27 | Th-Eu-Eua-Gli | Rodentia | Myo-Mur      | Cricetidae | Neotominae  | <i>Peromyscus</i>             |
| <i>Peromyscus maniculatus bairdii</i> | rodPEman | NC_056022    | Rod | 27 | Th-Eu-Eua-Gli | Rodentia | Myo-Mur      | Cricetidae | Neotominae  | <i>Peromyscus maniculatus</i> |
| <i>Meriones unguiculatus</i>          | rodMEung | NW_018657810 | Rod | 27 | Th-Eu-Eua-Gli | Rodentia | Myo-Mur      | Muridae    | Gerbillinae | <i>Meriones</i>               |
| <i>Arvicanthis niloticus</i>          | rodARNil | NC_047676    | Rod | 27 | Th-Eu-Eua-Gli | Rodentia | Myo-Mur      | Muridae    | Murinae     | <i>Arvicanthis</i>            |
| <i>Grammomys surdaster</i>            | rodGRsur | NW_021605262 | Rod | 27 | Th-Eu-Eua-Gli | Rodentia | Myo-Mur      | Muridae    | Murinae     | <i>Grammomys</i>              |
| <i>Mastomys coucha</i>                | rodMAcou | NW_022196914 | Rod | 27 | Th-Eu-Eua-Gli | Rodentia | Myo-Mur      | Muridae    | Murinae     | <i>Mastomys</i>               |
| <i>Mus pahari</i>                     | rodMUpah | NC_034600    | Rod | 27 | Th-Eu-Eua-Gli | Rodentia | Myo-Mur      | Muridae    | Murinae     | <i>Mus Coelomys</i>           |
| <i>Mus musculus</i>                   | rodMUmus | NC_000079    | Rod | 27 | Th-Eu-Eua-Gli | Rodentia | Myo-Mur      | Muridae    | Murinae     | <i>Mus Mus</i>                |
| <i>Mus caroli</i>                     | rodMUcar | NC_034582    | Rod | 27 | Th-Eu-Eua-Gli | Rodentia | Myo-Mur      | Muridae    | Murinae     | <i>Mus Mus</i>                |
| <i>Rattus norvegicus</i>              | rodRANor | NC_051336    | Rod | 27 | Th-Eu-Eua-Gli | Rodentia | Myo-Mur      | Muridae    | Murinae     | <i>Rattus</i>                 |
| <i>Nannospalax galili</i>             | rodNAGal | NW_008355380 | Rod | 27 | Th-Eu-Eua-Gli | Rodentia | Myo-Mur      | Spalacidae | Spalacinae  | <i>Nannospalax</i>            |
| <i>Ictidomys tridecemlineatus</i>     | rodICTri | NW_024407213 | Rod | 27 | Th-Eu-Eua-Gli | Rodentia | Sciuromorpha | Sciuridae  | Xerinae     | <i>Ictidomys</i>              |

|                           |          |              |     |    |               |          |                     |                 |                 |                 |
|---------------------------|----------|--------------|-----|----|---------------|----------|---------------------|-----------------|-----------------|-----------------|
| Marmota flaviventris      | rodMAfla | NW_023144708 | Rod | 27 | Th-Eu-Eua-Gli | Rodentia | Sciuromorpha        | Sciuridae       | Xerinae         | Marmota         |
| Urocitellus parryi        | rodURpar | NW_020540633 | Rod | 27 | Th-Eu-Eua-Gli | Rodentia | Sciuromorpha        | Sciuridae       | Xerinae         | Urocitellus     |
| Cercocebus atys           | priCEaty | NW_012002678 | Pri | 25 | Th-Eu-Lau     | Primates | Haplo-Simii-Cat-Cer | Cercopithecidae | Cercopithecinae | Cercocebus      |
| Chlorocebus sabaeus       | priCHsab | NW_023666054 | Pri | 25 | Th-Eu-Lau     | Primates | Haplo-Simii-Cat-Cer | Cercopithecidae | Cercopithecinae | Chlorocebus     |
| Macaca nemestrina         | priMANem | NW_012012689 | Pri | 25 | Th-Eu-Lau     | Primates | Haplo-Simii-Cat-Cer | Cercopithecidae | Cercopithecinae | Macaca          |
| Macaca mulatta            | priAMul  | NC_041759    | Pri | 25 | Th-Eu-Lau     | Primates | Haplo-Simii-Cat-Cer | Cercopithecidae | Cercopithecinae | Macaca          |
| Macaca fascicularis       | priMAfas | NC_052260    | Pri | 25 | Th-Eu-Lau     | Primates | Haplo-Simii-Cat-Cer | Cercopithecidae | Cercopithecinae | Macaca          |
| Papio anubis              | priPAanu | NC_044980    | Pri | 25 | Th-Eu-Lau     | Primates | Haplo-Simii-Cat-Cer | Cercopithecidae | Cercopithecinae | Papio           |
| Theropithecus gelada      | priTHgel | NC_037673    | Pri | 25 | Th-Eu-Lau     | Primates | Haplo-Simii-Cat-Cer | Cercopithecidae | Cercopithecinae | Theropithecus   |
| Ptilocolobus tephrosceles | priPltep | NC_045437    | Pri | 25 | Th-Eu-Lau     | Primates | Haplo-Simii-Cat-Cer | Cercopithecidae | Colobinae       | Ptilocolobus    |
| Rhinopithecus roxellana   | priRHrox | NC_044551    | Pri | 25 | Th-Eu-Lau     | Primates | Haplo-Simii-Cat-Cer | Cercopithecidae | Colobinae       | Rhinopithecus   |
| Rhinopithecus bieti       | priRHbie | NW_016814059 | Pri | 25 | Th-Eu-Lau     | Primates | Haplo-Simii-Cat-Cer | Cercopithecidae | Colobinae       | Rhinopithecus   |
| Trachypithecus francoisi  | priTRfra | NW_022681465 | Pri | 25 | Th-Eu-Lau     | Primates | Haplo-Simii-Cat-Cer | Cercopithecidae | Colobinae       | Trachypithecus  |
| Gorilla gorilla gorilla   | priGOgor | NC_044619    | Pri | 25 | Th-Eu-Lau     | Primates | Haplo-Simii-Cat-Hom | Hominidae       | Homininae       | Gorilla gorilla |

|                       |          |              |     |    |           |           |                     |                |                |                          |
|-----------------------|----------|--------------|-----|----|-----------|-----------|---------------------|----------------|----------------|--------------------------|
| Homo sapiens          | priHOsap | NC_000005    | Pri | 25 | Th-Eu-Lau | Primates  | Haplo-Simii-Cat-Hom | Hominidae      | Homininae      | Homo                     |
| Pan troglodytes       | priPAtro | NC_036884    | Pri | 25 | Th-Eu-Lau | Primates  | Haplo-Simii-Cat-Hom | Hominidae      | Homininae      | Pan                      |
| Pan paniscus          | priPApan | NC_048244    | Pri | 25 | Th-Eu-Lau | Primates  | Haplo-Simii-Cat-Hom | Hominidae      | Homininae      | Pan                      |
| Pongo abelii          | priPOabe | NC_036908    | Pri | 25 | Th-Eu-Lau | Primates  | Haplo-Simii-Cat-Hom | Hominidae      | Ponginae       | Pongo                    |
| Hylobates moloch      | priHYmol | NW_022611659 | Pri | 25 | Th-Eu-Lau | Primates  | Haplo-Simii-Cat-Hom | Hylobatidae    |                | Hylobates                |
| Nomascus leucogenys   | priNOleu | NC_044386    | Pri | 25 | Th-Eu-Lau | Primates  | Haplo-Simii-Cat-Hom | Hylobatidae    |                | Nomascus                 |
| Aotus nancymae        | priAOnan | NW_018503740 | Pri | 25 | Th-Eu-Lau | Primates  | Haplo-Simii-Plat    | Aotidae        |                | Aotus                    |
| Callithrix jacchus    | priCAjac | NC_048384    | Pri | 25 | Th-Eu-Lau | Primates  | Haplo-Simii-Plat    | Cebidae        | Callitrichinae | Callithrix<br>Callithrix |
| Sapajus apella        | priSAape | NW_022436951 | Pri | 25 | Th-Eu-Lau | Primates  | Haplo-Simii-Plat    | Cebidae        | Cebinae        | Sapajus                  |
| Saimiri boliviensis   | priSAbol | NW_024100917 | Pri | 25 | Th-Eu-Lau | Primates  | Haplo-Simii-Plat    | Cebidae        | Saimiriinae    | Saimiri                  |
| Microcebus murinus    | priMImur | NC_033671    | Pri | 25 | Th-Eu-Lau | Primates  | Strep-lemur         | Cheirogaleidae |                | Microcebus               |
| Propithecus coquereli | priPRcoq | NW_012154474 | Pri | 25 | Th-Eu-Lau | Primates  | Strep-lemur         | Indriidae      |                | Propithecus              |
| Otolemur garnettii    | priOTgar | NW_003852621 | Pri | 25 | Th-Eu-Lau | Primates  | Strep-Loris         | Galagidae      |                | Otolemur                 |
| Canis lupus dingo     | carCALup | NC_051838    | Car | 25 | Th-Eu-Lau | Carnivora | Caniformia          | Canidae        | Canis          | Canis lupus              |



|                             |          |              |     |    |           |           |            |            |            |                   |
|-----------------------------|----------|--------------|-----|----|-----------|-----------|------------|------------|------------|-------------------|
| Canis lupus familiaris      | carCALup | NC_051838    | Car | 25 | Th-Eu-Lau | Carnivora | Caniformia | Canidae    | Canis      | Canis lupus       |
| Vulpes lagopus              | carVUlag | NC_054840    | Car | 25 | Th-Eu-Lau | Carnivora | Caniformia | Canidae    |            | Vulpes            |
| Enhydra lutris kenyonii     | carENlut | NW_019154116 | Car | 25 | Th-Eu-Lau | Carnivora | Caniformia | Mustelidae | Lutrinae   | Enhydra lutris    |
| Lontra canadensis           | carLOcan | NW_022631016 | Car | 25 | Th-Eu-Lau | Carnivora | Caniformia | Mustelidae | Lutrinae   | Lontra            |
| Mustela erminea             | carMUerm | NC_045616    | Car | 25 | Th-Eu-Lau | Carnivora | Caniformia | Mustelidae | Mustelinae | Mustela           |
| Mustela putorius furo       | carMUput | NW_025421284 | Car | 25 | Th-Eu-Lau | Carnivora | Caniformia | Mustelidae | Mustelinae | Mustela putorius  |
| Odobenus rosmarus divergens | carODros | NW_004450831 | Car | 25 | Th-Eu-Lau | Carnivora | Caniformia | Odobenidae | Odobenus   | Odobenus rosmarus |
| Callorhinus ursinus         | carCAurs | NW_020312816 | Car | 25 | Th-Eu-Lau | Carnivora | Caniformia | Otariidae  |            | Callorhinus       |
| Eumetopias jubatus          | carEUjub | NW_020998780 | Car | 25 | Th-Eu-Lau | Carnivora | Caniformia | Otariidae  |            | Eumetopias        |
| Zalophus californianus      | carZAcad | NC_045599    | Car | 25 | Th-Eu-Lau | Carnivora | Caniformia | Otariidae  |            | Zalophus          |
| Halichoerus grypus          | carHAgry | NW_023400076 | Car | 25 | Th-Eu-Lau | Carnivora | Caniformia | Phocidae   |            | Halichoerus       |
| Mirounga leonina            | carMlleo | NW_023270865 | Car | 25 | Th-Eu-Lau | Carnivora | Caniformia | Phocidae   |            | Mirounga          |
| Neomonachus schauinslandi   | carNEsch | NC_058409    | Car | 25 | Th-Eu-Lau | Carnivora | Caniformia | Phocidae   |            | Neomonachus       |
| Phoca vitulina              | carPHvit | NW_022589720 | Car | 25 | Th-Eu-Lau | Carnivora | Caniformia | Phocidae   |            | Phoca             |
| Ursus arctos horribilis     | carURarc | NW_025929695 | Car | 25 | Th-Eu-Lau | Carnivora | Caniformia | Ursidae    | Ursus      | Ursus arctos      |

|                                |          |              |     |    |           |              |            |             |               |                        |
|--------------------------------|----------|--------------|-----|----|-----------|--------------|------------|-------------|---------------|------------------------|
| Ursus maritimus                | carURmar | NW_024423897 | Car | 25 | Th-Eu-Lau | Carnivora    | Caniformia | Ursidae     |               | Ursus                  |
| Acinonyx jubatus               | carACjub | NW_020834736 | Car | 25 | Th-Eu-Lau | Carnivora    | Feliformia | Felidae     | Acinonychinae | Acinonyx               |
| Felis catus                    | carFEcat | NC_058368    | Car | 25 | Th-Eu-Lau | Carnivora    | Feliformia | Felidae     | Felinae       | Felis                  |
| Lynx canadensis                | carLYcan | NC_044303    | Car | 25 | Th-Eu-Lau | Carnivora    | Feliformia | Felidae     | Felinae       | Lynx                   |
| Puma yagouaroundi              | carPUyag | NW_024412377 | Car | 25 | Th-Eu-Lau | Carnivora    | Feliformia | Felidae     | Felinae       | Puma                   |
| Puma concolor                  | carPUcon | NW_020339444 | Car | 25 | Th-Eu-Lau | Carnivora    | Feliformia | Felidae     | Felinae       | Puma                   |
| Panthera tigris altaica        | carPATig | NC_056660    | Car | 25 | Th-Eu-Lau | Carnivora    | Feliformia | Felidae     | Pantherinae   | Panthera tigris        |
| Suricata suricatta             | carSUSur | NC_043705    | Car | 25 | Th-Eu-Lau | Carnivora    | Feliformia | Herpestidae |               | Suricata               |
| Hyaena hyaena                  | carHYhya | NW_024080766 | Car | 25 | Th-Eu-Lau | Carnivora    | Feliformia | Hyaenidae   |               | Hyaena                 |
| Camelus ferus                  | artCAfer | NC_045698    | Art | 23 | Th-Eu-Lau | Artiodactyla | Tylopoda   | Camelidae   |               | Camelus                |
| Camelus dromedarius            | artCADro | NC_044513    | Art | 23 | Th-Eu-Lau | Artiodactyla | Tylopoda   | Camelidae   |               | Camelus                |
| Vicugna pacos                  | artVIpac | NW_021964160 | Art | 23 | Th-Eu-Lau | Artiodactyla | Tylopoda   | Camelidae   |               | Vicugna                |
| Bison bison bison              | artBlbis | NW_011494949 | Art | 23 | Th-Eu-Lau | Artiodactyla | Ru-Pec     | Bovidae     | Bovinae       | Bison bison            |
| Bos indicus                    | artBOind | NC_032669    | Art | 23 | Th-Eu-Lau | Artiodactyla | Ru-Pec     | Bovidae     | Bovinae       | Bos                    |
| Bos taurus                     | artBOtau | NC_037347    | Art | 23 | Th-Eu-Lau | Artiodactyla | Ru-Pec     | Bovidae     | Bovinae       | Bos                    |
| Bubalus bubalis                | artBUbub | NC_059175    | Art | 23 | Th-Eu-Lau | Artiodactyla | Ru-Pec     | Bovidae     | Bovinae       | Bubalus                |
| Capra hircus                   | artCAhir | NC_030827    | Art | 23 | Th-Eu-Lau | Artiodactyla | Ru-Pec     | Bovidae     | Caprinae      | Capra                  |
| Ovis aries                     | artOVari | NC_056069    | Art | 23 | Th-Eu-Lau | Artiodactyla | Ru-Pec     | Bovidae     | Caprinae      | Ovis                   |
| Oryx dammah                    | artORDam | NW_024070204 | Art | 23 | Th-Eu-Lau | Artiodactyla | Ru-Pec     | Bovidae     | Hippotraginae | Oryx                   |
| Odocoileus virginianus texanus | artODvir | NW_018332784 | Art | 23 | Th-Eu-Lau | Artiodactyla | Ru-Pec     | Cervidae    | Odocoileinae  | Odocoileus virginianus |

|                                                |          |              |     |    |           |              |                 |                 |               |                                |
|------------------------------------------------|----------|--------------|-----|----|-----------|--------------|-----------------|-----------------|---------------|--------------------------------|
| Sus scrofa                                     | artSUscr | NC_010458    | Art | 23 | Th-Eu-Lau | Artiodactyla | Suina           | Suidae          |               | Sus                            |
| Balaenoptera musculus                          | artBAMus | NC_045787    | Art | 23 | Th-Eu-Lau | Artiodactyla | Whi-Cet-Mys     | Balaenopteridae |               | Balaenoptera                   |
| Globicephala melas                             | artGLmel | NW_022134865 | Art | 23 | Th-Eu-Lau | Artiodactyla | Whi-Cet-odo     | Delphinidae     |               | Globicephala                   |
| Lagenorhynchus obliquidens                     | artLAobl | NW_020837973 | Art | 23 | Th-Eu-Lau | Artiodactyla | Whi-Cet-odo     | Delphinidae     |               | Lagenorhynchus                 |
| Orcinus orca                                   | artORorc | NC_064561    | Art | 23 | Th-Eu-Lau | Artiodactyla | Whi-Cet-odo     | Delphinidae     |               | Orcinus                        |
| Tursiops truncatus                             | artTUtru | NC_047036    | Art | 23 | Th-Eu-Lau | Artiodactyla | Whi-Cet-odo     | Delphinidae     |               | Tursiops                       |
| Lipotes vexillifer                             | artLVex  | NW_006799734 | Art | 23 | Th-Eu-Lau | Artiodactyla | Whi-Cet-odo     | Lipotidae       |               | Lipotes                        |
| Delphinapterus leucas                          | artDEleu | NW_022098008 | Art | 23 | Th-Eu-Lau | Artiodactyla | Whi-Cet-odo     | Monodontidae    |               | Delphinapterus                 |
| Monodon monoceros                              | artMOMon | NW_021703768 | Art | 23 | Th-Eu-Lau | Artiodactyla | Whi-Cet-odo     | Monodontidae    |               | Monodon                        |
| Neophocaena asiaeorientalis<br>asiaeorientalis | artNEasi | NW_020175679 | Art | 23 | Th-Eu-Lau | Artiodactyla | Whi-Cet-odo     | Phocoenidae     |               | Neophocaena<br>asiaeorientalis |
| Phocoena sinus                                 | artPHsin | NC_045765    | Art | 23 | Th-Eu-Lau | Artiodactyla | Whi-Cet-odo     | Phocoenidae     |               | Phocoena                       |
| Physeter catodon                               | artPHcat | NC_041221    | Art | 23 | Th-Eu-Lau | Artiodactyla | Whi-Cet-odo     | Physeteridae    |               | Physeter                       |
| Hipposideros armiger                           | chiHlarm | NW_017731935 | Chi | 14 | Th-Eu-Lau | Chiroptera   | Microchiroptera | Hipposideridae  |               | Hipposideros                   |
| Molossus molossus                              | chiMOMol | NW_023425366 | Chi | 14 | Th-Eu-Lau | Chiroptera   | Microchiroptera | Molossidae      |               | Molossus                       |
| Desmodus rotundus                              | chiDERot | NW_020093731 | Chi | 14 | Th-Eu-Lau | Chiroptera   | Microchiroptera | Phyllostomidae  | Desmodontinae | Desmodus                       |

|                              |          |              |     |    |           |                |                 |                  |                 |                        |
|------------------------------|----------|--------------|-----|----|-----------|----------------|-----------------|------------------|-----------------|------------------------|
| Phyllostomus discolor        | chiPHdis | NC_040905    | Chi | 14 | Th-Eu-Lau | Chiroptera     | Microchiroptera | Phyllostomidae   | Phyllostominae  | Phyllostomus           |
| Sturnira hondurensis         | chiSThon | NW_023521217 | Chi | 14 | Th-Eu-Lau | Chiroptera     | Microchiroptera | Phyllostomidae   | Stenodermatinae | Sturnira               |
| Rhinolophus ferrumequinum    | chiRHfer | NC_046290    | Chi | 14 | Th-Eu-Lau | Chiroptera     | Microchiroptera | Rhinolophidae    | Rhinolophinae   | Rhinolophus            |
| Eptesicus fuscus             | chiEPfus | NW_007370656 | Chi | 14 | Th-Eu-Lau | Chiroptera     | Microchiroptera | Vespertilionidae |                 | Eptesicus              |
| Myotis davidii               | chiMYdav | NW_006289813 | Chi | 14 | Th-Eu-Lau | Chiroptera     | Microchiroptera | Vespertilionidae |                 | Myotis                 |
| Myotis brandtii              | chiMYbra | NW_005353967 | Chi | 14 | Th-Eu-Lau | Chiroptera     | Microchiroptera | Vespertilionidae |                 | Myotis                 |
| Myotis lucifugus             | chiMYluc | NW_005871048 | Chi | 14 | Th-Eu-Lau | Chiroptera     | Microchiroptera | Vespertilionidae |                 | Myotis                 |
| Myotis myotis                | chiMYmyo | NW_023416357 | Chi | 14 | Th-Eu-Lau | Chiroptera     | Microchiroptera | Vespertilionidae |                 | Myotis                 |
| Pipistrellus kuhlii          | chiPIkuh | NW_023425540 | Chi | 14 | Th-Eu-Lau | Chiroptera     | Microchiroptera | Vespertilionidae |                 | Pipistrellus           |
| Pteropus giganteus           | chiPTgig | NW_024351073 | Chi | 14 | Th-Eu-Lau | Chiroptera     | Megachiroptera  | Pteropodidae     | Pteropodinae    | Pteropus               |
| Rousettus aegyptiacus        | chiROaeg | NW_023416311 | Chi | 14 | Th-Eu-Lau | Chiroptera     | Megachiroptera  | Pteropodidae     | Pteropodinae    | Rousettus              |
| Equus przewalskii            | perEQprz | NW_007673864 | Per | 4  | Th-Eu-Lau | Perissodactyla |                 | Equidae          |                 | Equus                  |
| Equus caballus               | perEQcab | NC_009164    | Per | 4  | Th-Eu-Lau | Perissodactyla |                 | Equidae          |                 | Equus                  |
| Equus asinus                 | perEQasi | NC_052186    | Per | 4  | Th-Eu-Lau | Perissodactyla |                 | Equidae          |                 | Equus                  |
| Ceratotherium simum<br>simum | perCESim | NW_004454243 | Per | 4  | Th-Eu-Lau | Perissodactyla |                 | Rhinocerotidae   | Ceratotherium   | Ceratotherium<br>simum |
| Erinaceus europaeus          | eulEReur | NW_006804048 | Eul | 3  | Th-Eu-Lau | Eulipotyphla   |                 | Erinaceidae      | Erinaceinae     | Erinaceus              |
| Sorex araneus                | eulSOara | NW_004546046 | Eul | 3  | Th-Eu-Lau | Eulipotyphla   |                 | Soricidae        | Soricinae       | Sorex                  |
| Talpa occidentalis           | eulTAocc | NW_023604972 | Eul | 3  | Th-Eu-Lau | Eulipotyphla   |                 | Talpidae         |                 | Talpa                  |

|                                |          |              |     |   |               |               |  |                   |                 |                    |
|--------------------------------|----------|--------------|-----|---|---------------|---------------|--|-------------------|-----------------|--------------------|
| Trichosurus vulpecula          | dipTRvul | NC_050573    | Dip | 3 | Th-Met        | Diprotodontia |  | Phalangeridae     |                 | Trichosurus        |
| Phascolarctos cinereus         | dipPHcin | NW_018344251 | Dip | 3 | Th-Met        | Diprotodontia |  | Phascolarctidae   |                 | Phascolarctos      |
| Vombatus ursinus               | dipVOurs | NW_020954569 | Dip | 3 | Th-Met        | Diprotodontia |  | Vombatidae        |                 | Vombatus           |
| Orycteropus afer afer          | tubORafe | NW_006921890 | Tub | 2 | Th-Eu-Afro    | Tubulidentata |  | Orycteropodidae   |                 | Orycteropus        |
| Orycteropus afer               | tubORafe | NW_006921890 | Tub | 2 | Th-Eu-Afro    | Tubulidentata |  | Orycteropodidae   |                 | Orycteropus        |
| Manis pentadactyla             | phoMApen | NW_023454126 | Pho | 2 | Th-Eu-Lau     | Pholidota     |  | Manidae           |                 | Manis              |
| Manis javanica                 | phoMAjav | NW_023436000 | Pho | 2 | Th-Eu-Lau     | Pholidota     |  | Manidae           |                 | Manis              |
| Ornithorhynchus anatinus       | monORana | NC_041751    | Mon | 2 | Prototheria   | Monotremata   |  | Ornithorhynchidae |                 | Ornithorhynchus    |
| Tachyglossus aculeatus         | monTAacu | NC_052099    | Mon | 2 | Prototheria   | Monotremata   |  | Tachyglossidae    |                 | Tachyglossus       |
| Ochotona curzoniae             | lagOCcur | NW_024465582 | Lag | 2 | Th-Eu-Eua-Gli | Lagomorpha    |  | Ochotonidae       |                 | Ochotona           |
| Ochotona princeps              | lagOCpri | NC_050546    | Lag | 2 | Th-Eu-Eua-Gli | Lagomorpha    |  | Ochotonidae       |                 | Ochotona           |
| Chrysochloris asiatica         | afrCHasi | NW_006408713 | Afr | 2 | Th-Eu-Afro    | Afrosoricida  |  | Chrysochloridae   | Chrysochlorinae | Chrysochloris      |
| Echinops telfairi              | afrECTel | NW_022111373 | Afr | 2 | Th-Eu-Afro    | Afrosoricida  |  | Tenrecinae        |                 | Echinops           |
| Trichechus manatus latirostris | sirTRman | NW_004444008 | Sir | 1 | Th-Eu-Afro    | Sirenia       |  | Trichechidae      |                 | Trichechus manatus |

|                       |          |              |     |   |            |                 |          |                 |             |              |
|-----------------------|----------|--------------|-----|---|------------|-----------------|----------|-----------------|-------------|--------------|
| Loxodonta africana    | proLOafr | NW_003573427 | Pro | 1 | Th-Eu      | Proboscidea     |          | Elephantidae    |             | Loxodonta    |
| Choloepus didactylus  | pilCHdid | NC_051317    | Pil | 1 | Th-Eu-Xen  | Pilosa          | Folivora | Megalonychidae  |             | Choloepus    |
| Elephantulus edwardii | macELedw | NW_006399875 | Mac | 1 | Th-Eu-Afro | Macroscelidea   |          | Macroscelididae |             | Elephantulus |
| Monodelphis domestica | didMOdom | NC_008803    | Did | 1 | Th-Met     | Didelphimorphia |          | Didelphidae     | Didelphinae | Monodelphis  |
| Sarcophilus harrisii  | dasSAhar | NC_045426    | Das | 1 | Th-Met     | Dasyuromorphia  |          | Dasyuridae      |             | Sarcophilus  |
| Dasybus novemcinctus  | cinDAnov | NW_004481457 | Cin | 1 | Th-Eu-Xen  | Cingulata       |          | Dasypodidae     |             | Dasybus      |

**Table S2.** The number of reliable block alignments in *TERT* promoter regions per orders.

| Order of mammals                                                                        | <i>Primates</i> | <i>Artiodactyla</i> | <i>Carnivora</i>  | <i>Rodentia</i>  | <i>Chiroptera</i> |
|-----------------------------------------------------------------------------------------|-----------------|---------------------|-------------------|------------------|-------------------|
| Number of aligned blocks                                                                | 12              | 18                  | 14                | 23               | 11                |
| Number of nucleotides in reliable block* alignments (% of all nucleotides in promoters) | 19148<br>(77%)  | 19641<br>(82%)      | 22044<br>(88%)    | 14041<br>(52%)   | 10111<br>(72%)    |
| block's names**                                                                         | h18x413         | h13x114             | h10x119<br>h8x680 | h10x102          | h5x765<br>h3x159  |
|                                                                                         | h18x141         | h11x275             | h8x102<br>h7x183  | h4x296<br>h4x205 | h3x133<br>h3x120  |
|                                                                                         | h14x111         | h11x152             | h7x162<br>h7x112  | h4x174<br>h3x999 | h2x1006           |
|                                                                                         | h14x107         | h11x149             | h6x427            | h3x334           | h2x697            |
|                                                                                         | h11x123         |                     | h6x135            | h3x193           | h2x257            |
|                                                                                         | h5x139          | h10x153             | h4x707            | h3x165           | h2x157            |
|                                                                                         | h4x183          |                     | h3x959            | h3x153           | h2x154            |
|                                                                                         | h4x145          | h9x115              | h2x690            | h3x112           | h2x132            |
|                                                                                         | h3x708          | h9x115n1            | h2x195            | h3x109           | h2x122            |
|                                                                                         | h2x111          | h8x262              | h2x145            | h3x105           |                   |
|                                                                                         | h2x106          | h7x157              | h2x131            | h3x105n1         |                   |
|                                                                                         | h2x103          | h7x117              |                   | h3x100           |                   |
|                                                                                         |                 | h5x119              |                   | h3x100n1         |                   |
|                                                                                         |                 | h4x109              |                   | h2x356           |                   |
|                                                                                         |                 | h3x722              |                   | h2x222           |                   |
|                                                                                         |                 | h3x168              |                   | h2x199           |                   |
|                                                                                         |                 | h2x129              |                   | h2x166           |                   |
|                                                                                         |                 | h2x125              |                   | h2x151           |                   |
|                                                                                         |                 |                     |                   | h2x131           |                   |
|                                                                                         |                 |                     |                   | h2x120           |                   |
|                                                                                         |                 |                     |                   | h2x103           |                   |

\* The number is computed as the sum of products of the block length on the number of species in the block. This product exceeds the number of nucleotides in the block by the number of gaps. The number of gaps in the block is limited because of the requirement: 80% or more identical positions in a reliable block alignment.

\*\* Letter "h" denotes reliable block alignments, which include not all species of the order. The number of species within the block is written between characters "h" and "x". "x" is the delimiter. The length of the block is after "x". Letters "n1" are added to distinguish blocks with identical core names.

The set of species within a block is mainly matched with taxonomy divisions of various ranges. There are exceptions. The number of exceptions: *Primates*: 2, *Carnivora*: 1, *Artiodactyla*: 4, *Rodentia*: 11, *Chiroptera*: 5. We conclude that blocks of reliable alignments cover more than half of promoter regions within each order.

**Table S3.** The number of nucleotide substitutions and their type in the G4 loop-forming sequences of the *TERT* promoter regions (in the coding and noncoding strands) for different orders of mammals.

| Order               | Type of nucleotide substitutions | Number of nucleotide substitutions |                  |
|---------------------|----------------------------------|------------------------------------|------------------|
|                     |                                  | Coding strand                      | Noncoding strand |
| <i>Artiodactyla</i> | A↔G                              | 9                                  | 8                |
|                     | C↔T                              | 13                                 | 16               |
|                     | C↔G                              | 4                                  | 5                |
|                     | gap↔C                            | 3                                  | 6                |
|                     | A↔C                              | 2                                  | 3                |
|                     | gap↔G                            | 1                                  | 0                |
|                     | G↔T                              | 3                                  | 1                |
|                     | A↔T                              | 1                                  | 0                |
| <i>Rodentia</i>     | gap↔T                            | 1                                  | 0                |
|                     | A↔G                              | 0                                  | 3                |
|                     | C↔T                              | 1                                  | 2                |
|                     | C↔G                              | 1                                  | 1                |
|                     | gap↔C                            | 0                                  | 2                |
|                     | A↔C                              | 2                                  | 0                |
|                     | gap↔A                            | 0                                  | 4                |
|                     | G↔T                              | 0                                  | 1                |
| <i>Carnivora</i>    | A↔T                              | 0                                  | 0                |
|                     | A↔G                              | 2                                  | 4                |
|                     | G↔T                              | 2                                  | 4                |
|                     | C↔T                              | 6                                  | 17               |
|                     | A↔C                              | 1                                  | 6                |
|                     | gap↔G                            | 1                                  | 4                |
|                     | gap↔T                            | 1                                  | 4                |
|                     | C↔G                              | 2                                  | 14               |
|                     | gap↔C                            | 0                                  | 10               |
|                     | A↔T                              | 2                                  | 1                |
| <i>Primates</i>     | gap↔A                            | 0                                  | 1                |
|                     | A↔G                              | 1                                  | 10               |
|                     | G↔T                              | 0                                  | 4                |
|                     | C↔T                              | 0                                  | 17               |
|                     | C↔G                              | 0                                  | 9                |
|                     | A↔C                              | 0                                  | 6                |
|                     | gap↔C                            | 0                                  | 6                |
|                     | gap↔G                            | 0                                  | 1                |
|                     | A↔T                              | 0                                  | 1                |
|                     | gap↔A                            | 0                                  | 2                |
| <i>Chiroptera</i>   | gap↔T                            | 0                                  | 2                |
|                     | C↔T                              | 4                                  | 1                |
|                     | G↔T                              | 0                                  | 1                |
|                     | gap↔G                            | 0                                  | 1                |
|                     | A↔G                              | 2                                  | 2                |
|                     | gap↔A                            | 0                                  | 1                |
